# Supplementary material
Source: MDPI journal article supplement (https://www.mdpi.com/2673-687X/2/3/9)
Supplement: s1 [file s1]

## Supplementary Material

# Facile Synthesis and Characterization of Molybdenum Carbides/Carbon Nanocomposites by Laser Pyrolysis

**Théo Caroff** <sup>1,2,3</sup>, **Pitalinani Badaki** <sup>3,4</sup>, **Nathalie Herbert** <sup>4</sup>, **Franck Tessier** <sup>4</sup>, **David Berthebaud** <sup>1,2</sup>, **Naoki Ohashi** <sup>1,2</sup>, **Tetsuo Uchikoshi** <sup>1,2</sup>, **Pierre Lonchambon** <sup>3</sup>, **Nathalie Herlin-Boime** <sup>3,\*</sup> and **Fabien Grasset** <sup>1,4,\*</sup>

<sup>1</sup> CNRS-Saint-Gobain-NIMS, IRL 3629, Laboratory for Innovative Key Materials and Structures (LINK), NIMS, Tsukuba 305-0044, Japan

<sup>2</sup> Research Center for Functional Materials, National Institute for Materials Science (NIMS), Tsukuba 305-0044, Japan

<sup>3</sup> CEA, IRAMIS UMR NIMBE, Université Paris Saclay, F-91191 Gif-Sur-Yvette, France

<sup>4</sup> Univ Rennes, CNRS, ISCR (Institut des Sciences Chimiques de Rennes)–UMR6226, F-35000 Rennes, France

\* Correspondence: [nathalie.herlin@cea.fr](mailto:nathalie.herlin@cea.fr) (N.H.-B.); [fabien.grasset@univ-rennes1.fr](mailto:fabien.grasset@univ-rennes1.fr) (F.G.)

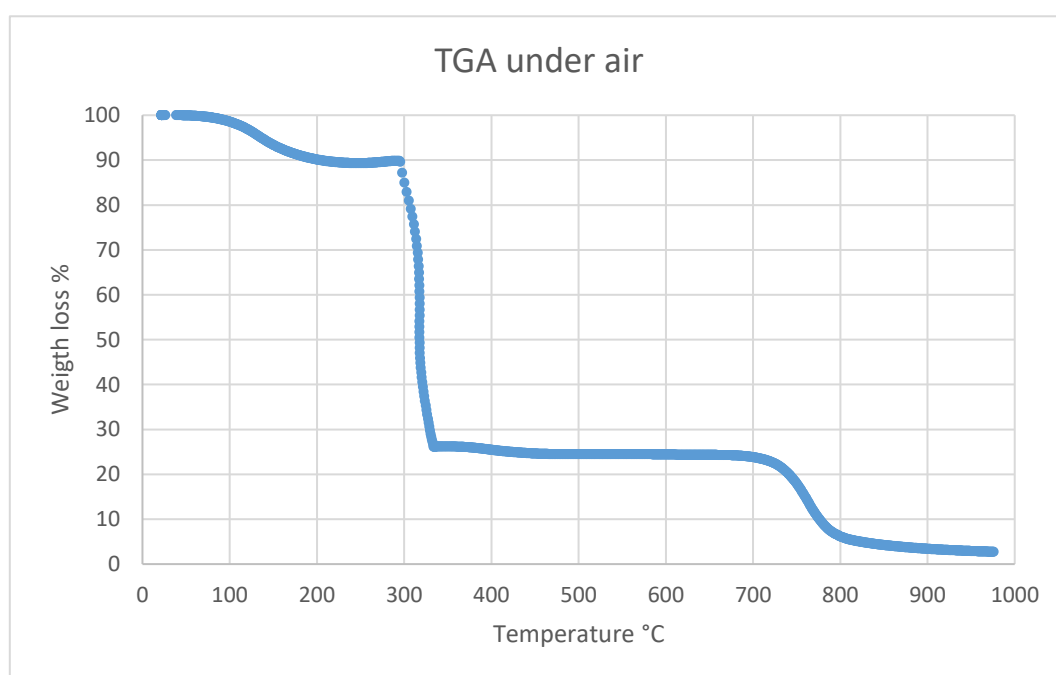

**Figure S1.** TGA of MOC9 under air.

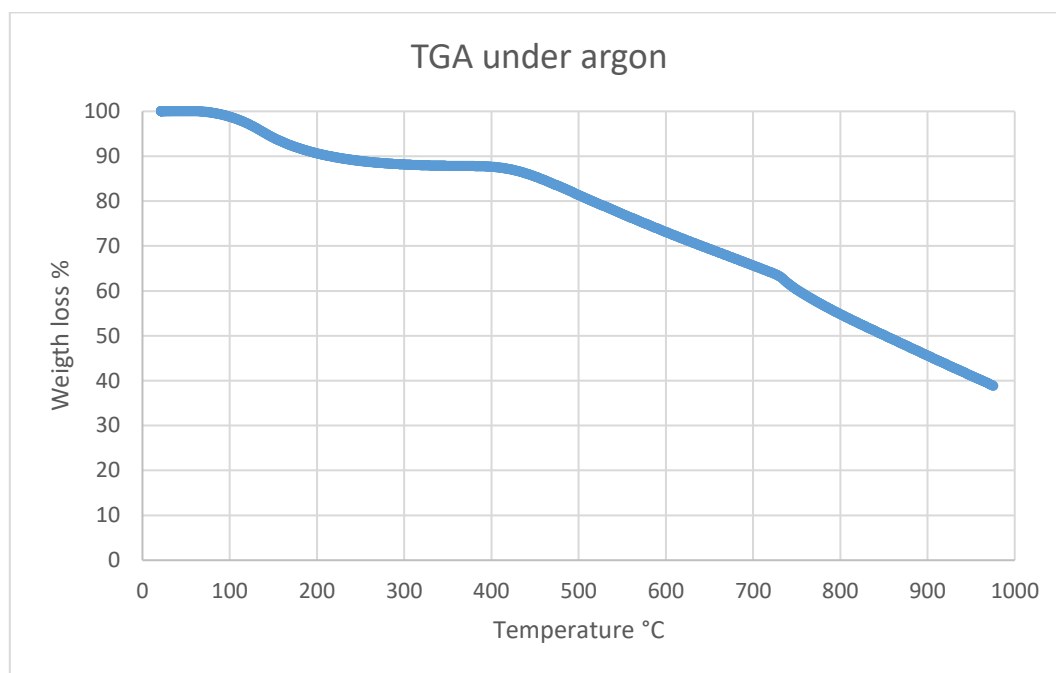

**Figure S2.** TGA of MOC9 under air.

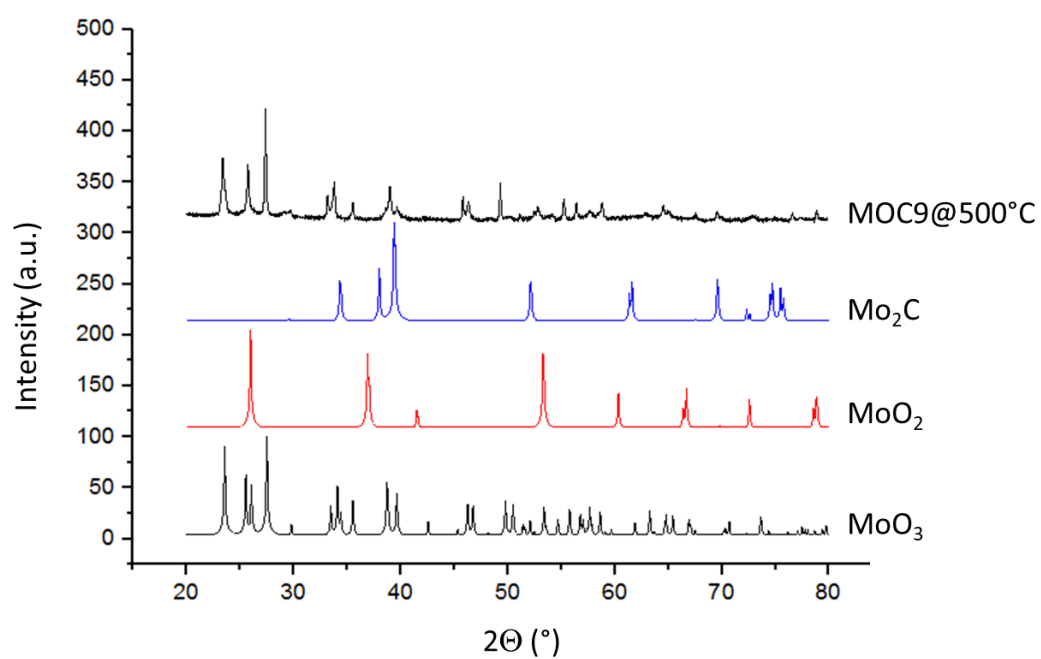

**Figure S3.** XRD patterns of MOC9@500 °C under air.

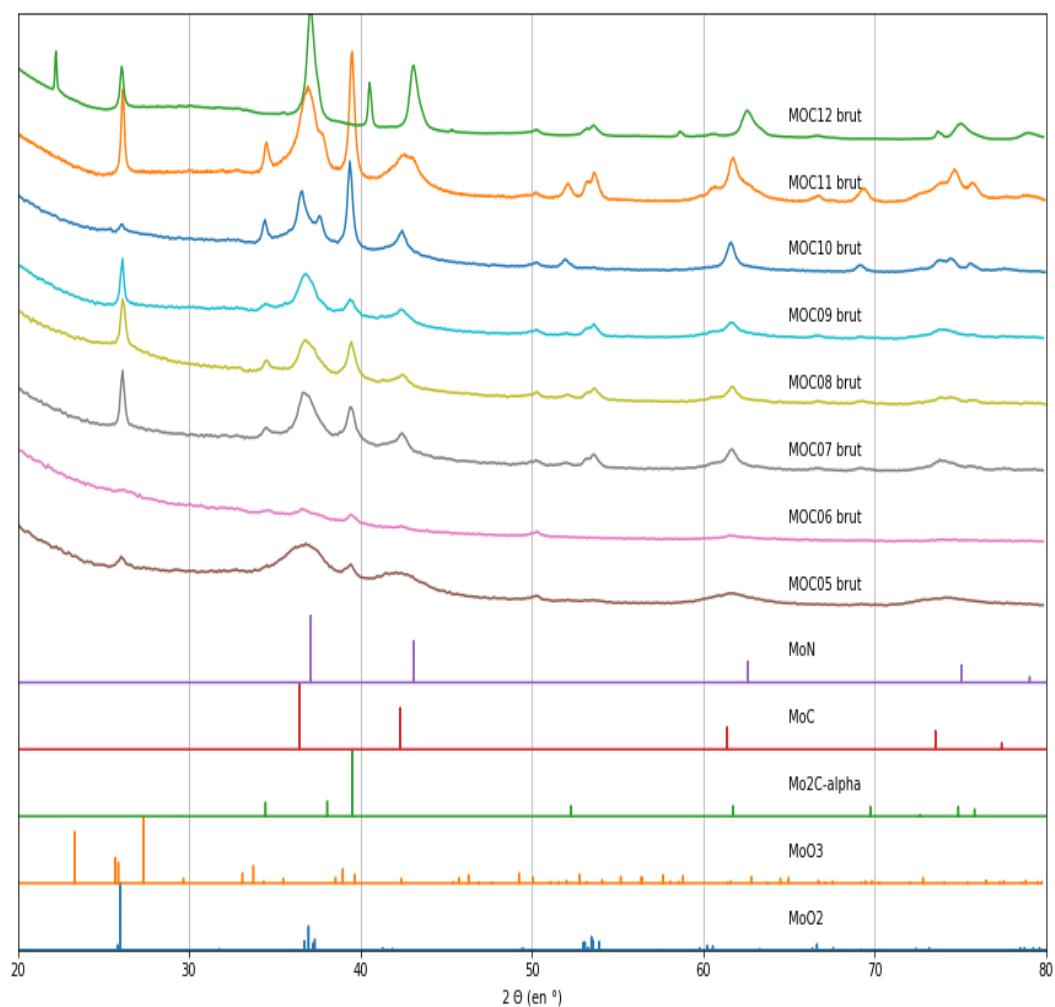

**Figure S4.** Powder-XRD patterns of MOCX ( $5 < X < 12$ ) obtained on sample without any treatment. The references plotted in the figure are obtained from the Eva data source software available on the DRX apparatus.

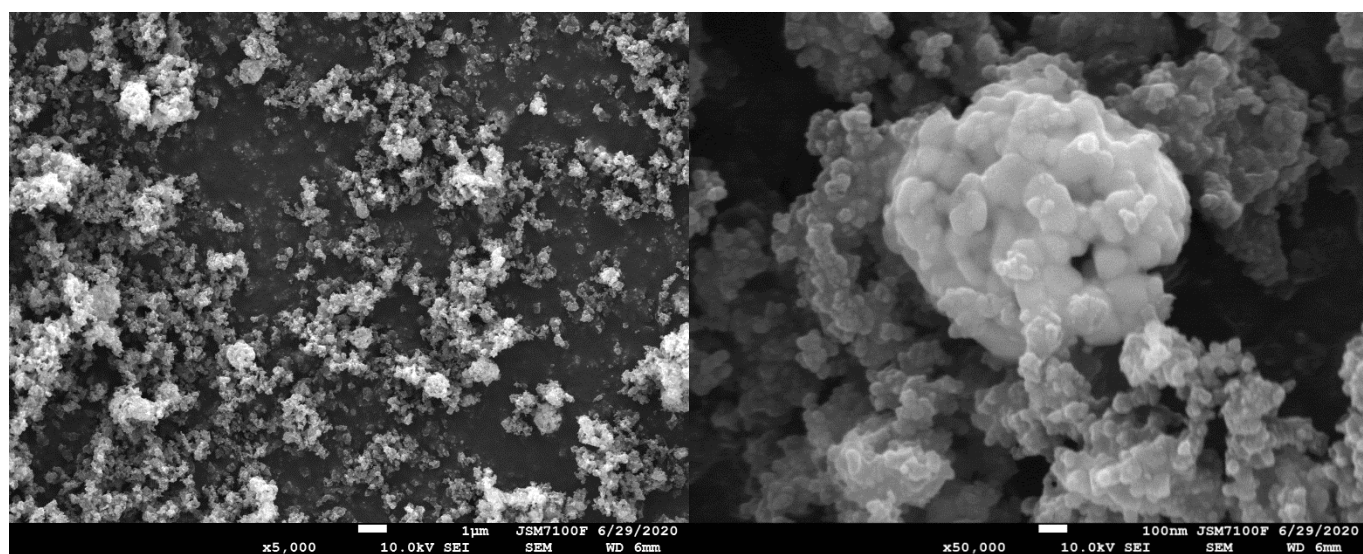

**Figure S5.** SEM image of MOC10 after annealing at 500 °C under argon.

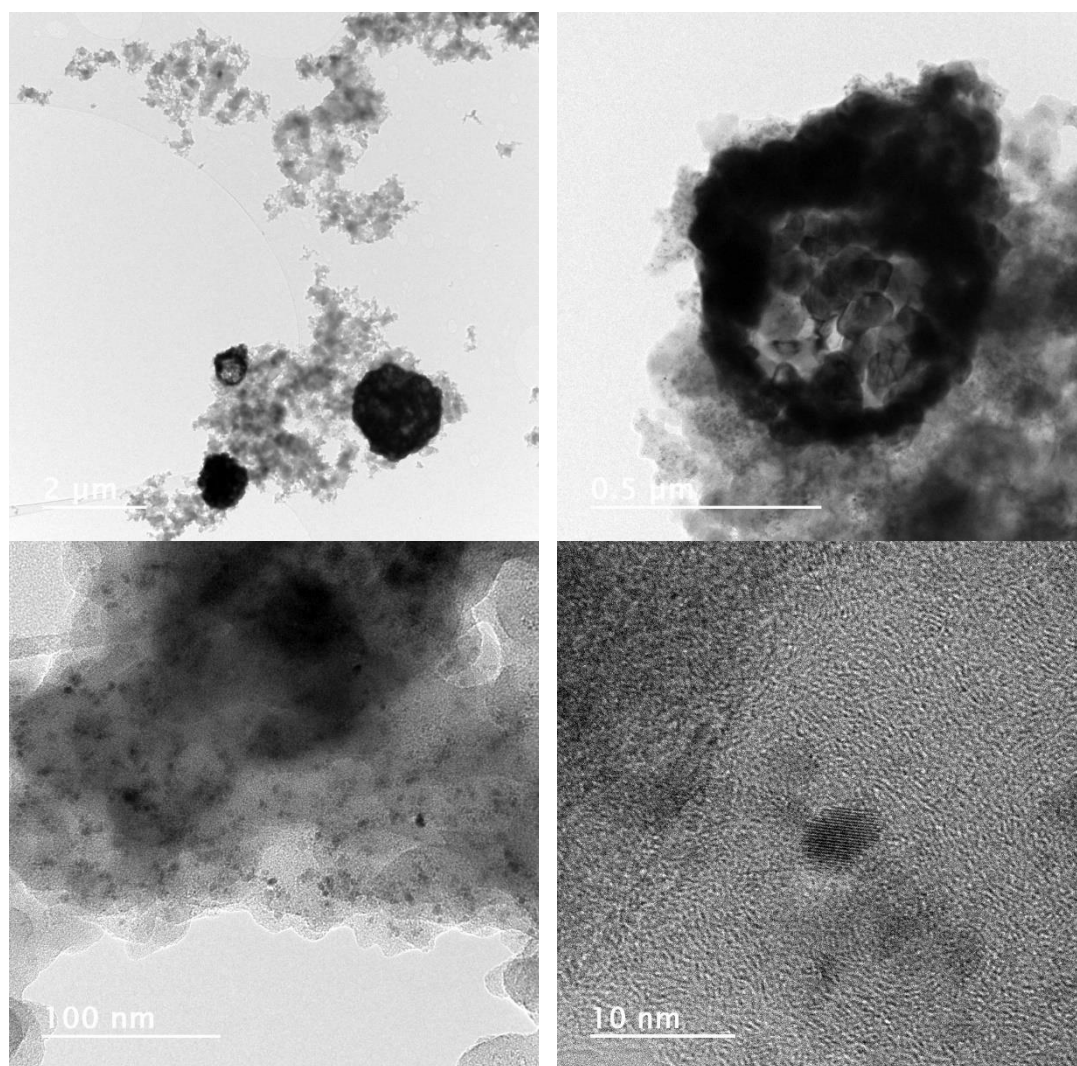

**Figure S6.** HRTEM image of MOC10 after annealing at 500 °C under argon.
